# Supplementary material for: Red-light-emitting electrochemical cell using a polypyridyl iridium(iii) polymer
Source: Royal Society of Chemistry journal article supplement (doi:10.1039/b910105e), 2009-01-01
Supplement: b910105e.pdf [file b910105e.pdf]

## Electronic Supplementary Information for:

### Red-light-emitting electrochemical cell using a polypyridyl iridium (III) polymer

**José Lorenzo Rodríguez-Redondo,<sup>a</sup> Rubén D. Costa,<sup>b</sup> Enrique Ortí,<sup>b</sup> Angela Sastre-Santos,<sup>a</sup> Henk J. Bolink,<sup>\*b</sup> and Fernando Fernández-Lázaro<sup>\*a</sup>**

<sup>a</sup> *División de Química Orgánica, Instituto de Bioingeniería, Universidad Miguel Hernández, Elche 03202 (Alicante), Spain. E-mail: fdofdez@umh.es*

<sup>b</sup> *Instituto de Ciencia Molecular, Universidad de Valencia, PO Box 22085, ES-46071, Valencia, Spain. E-mail: henk.bolink@uv.es*

## Contents:

### CHARACTERIZATION BY NMR SPECTROSCOPY

|                                                                                                    |    |
|----------------------------------------------------------------------------------------------------|----|
| <b>Figure S1</b> — Partial $^1\text{H}$ -NMR of a) monomer <b>7</b> and b) polymer <b>2</b> .----- | S3 |
| <b>Figure S2</b> — DQF-COSY of monomer <b>7</b> -----                                              | S4 |
| <b>Figure S3</b> — HSQC of monomer <b>7</b> -----                                                  | S5 |
| <b>Figure S4</b> — HSQC of complex <b>1</b> -----                                                  | S6 |

## CHARACTERIZATION BY NMR SPECTROSCOPY:

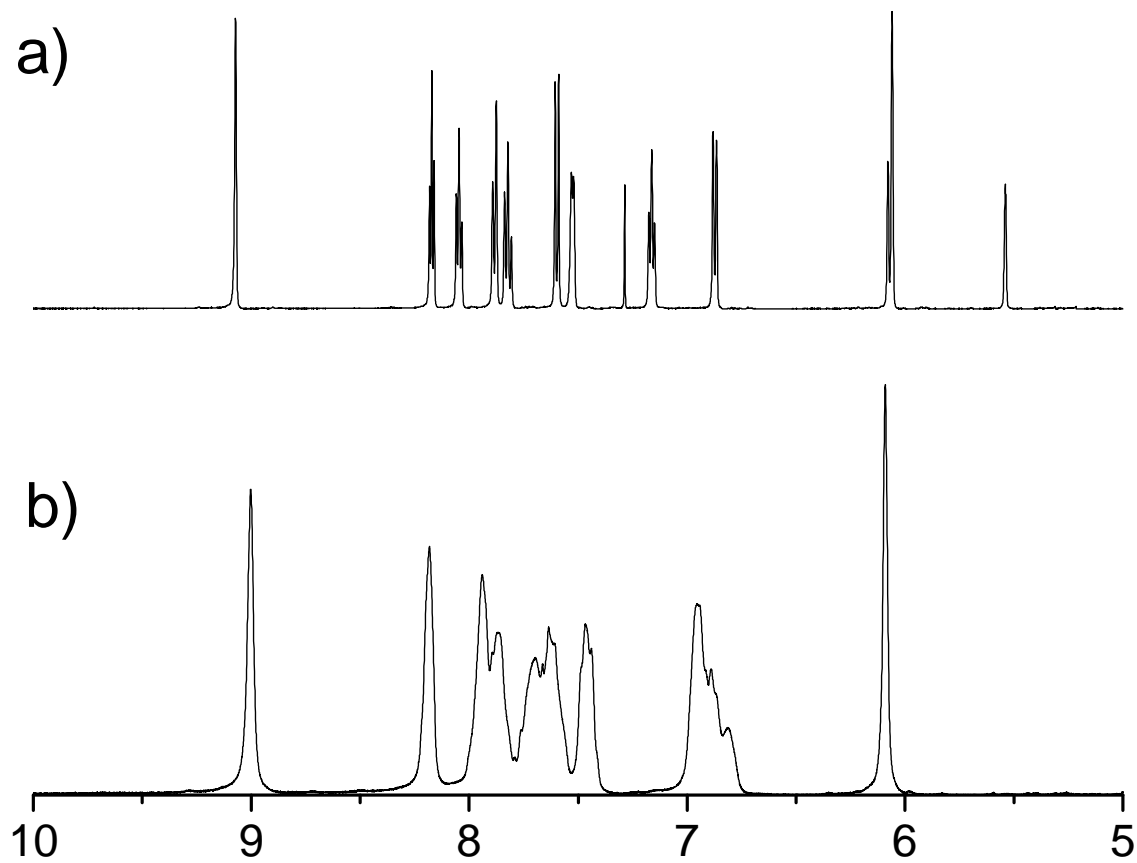

**Figure S1.** a) <sup>1</sup>H-NMR in CDCl<sub>3</sub> of the monomer **7** and b) <sup>1</sup>H-NMR in CD<sub>2</sub>Cl<sub>2</sub> of the polymer **2**.

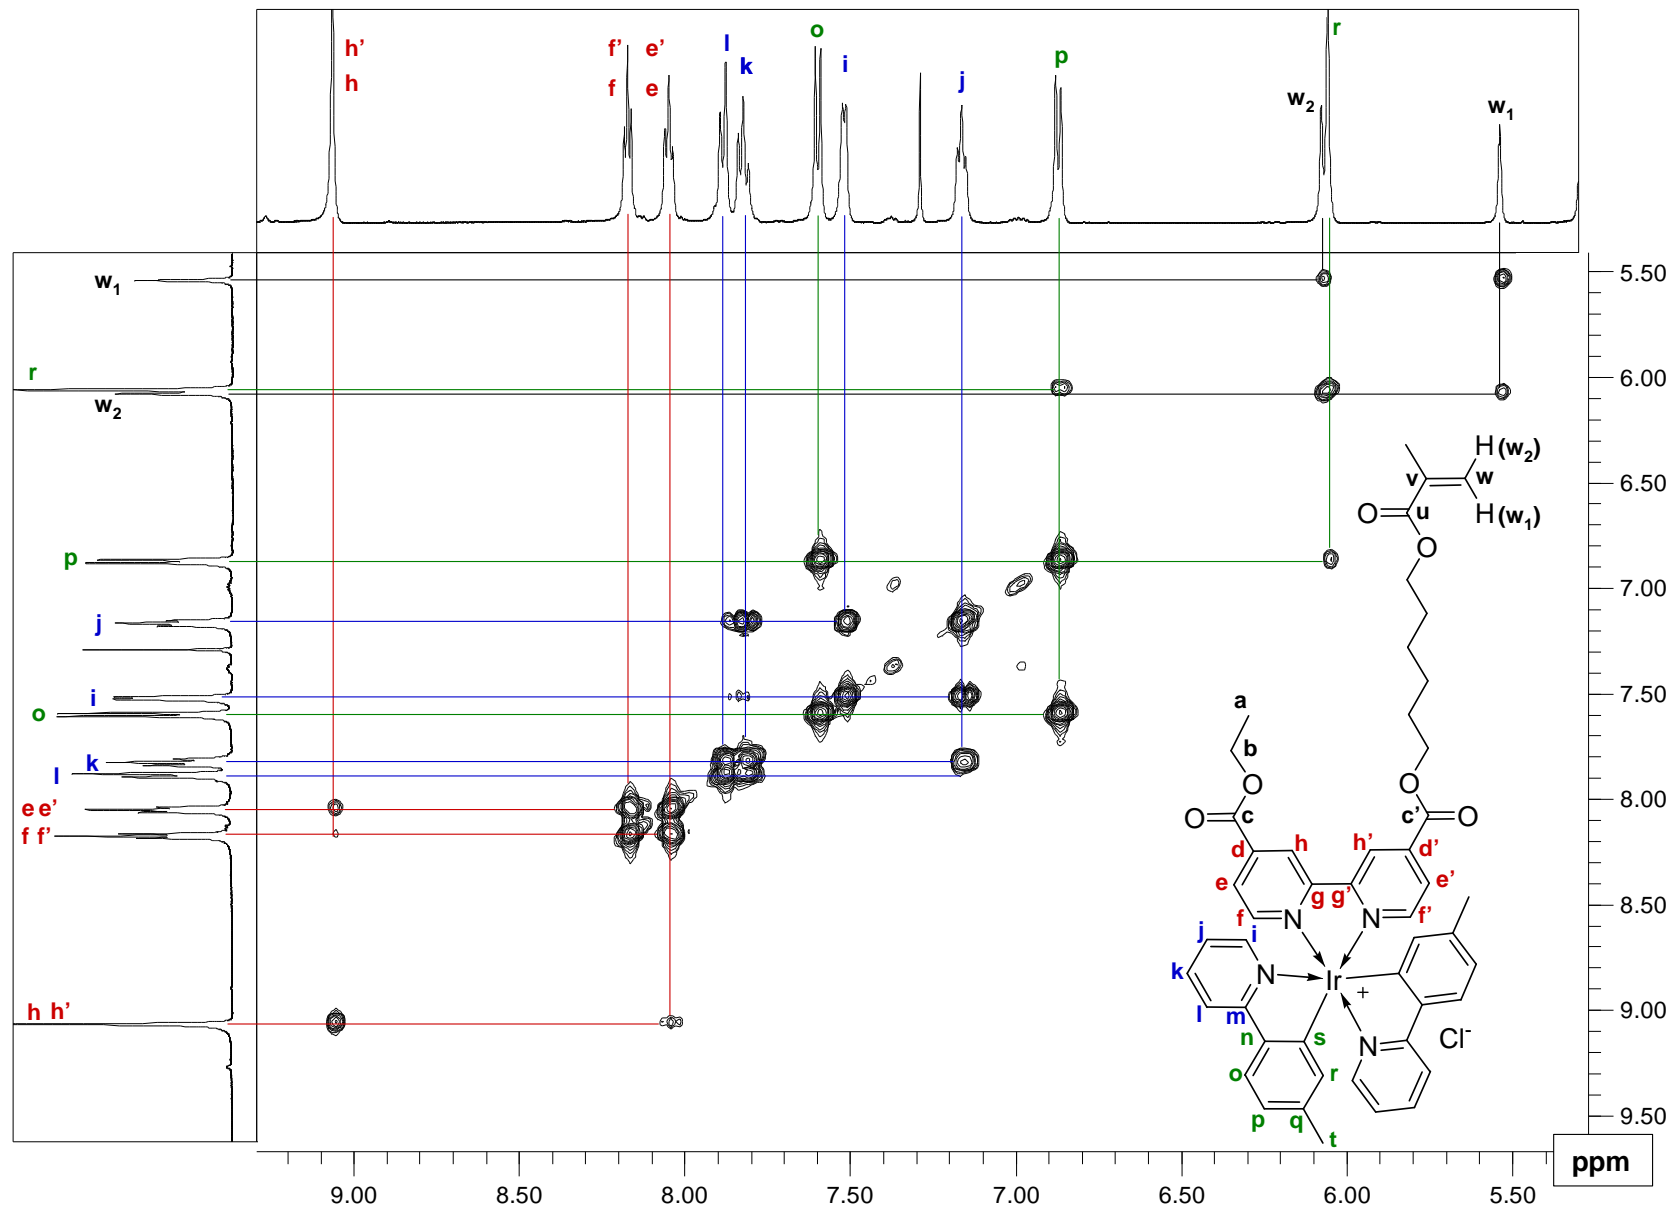

Figure S2. DQF-COSY of monomer 7.

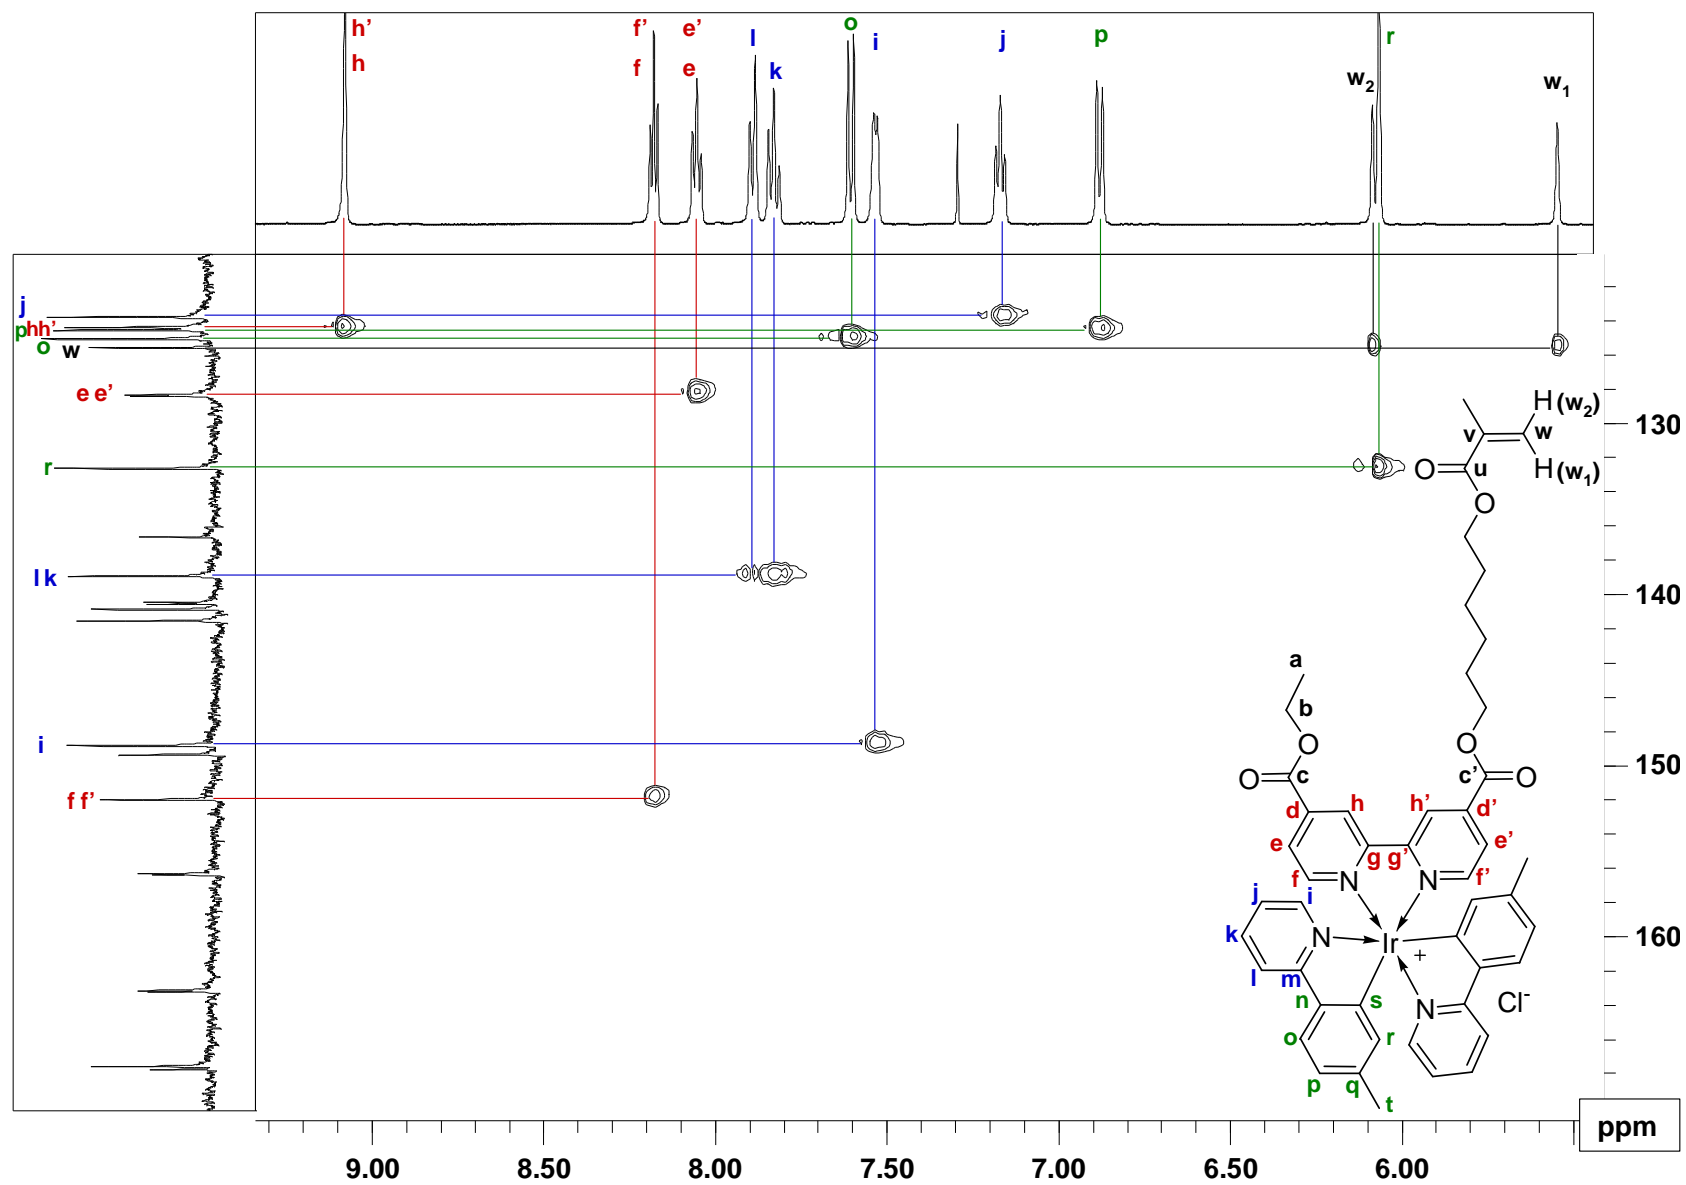

Figure S3. HSQC of monomer 7.

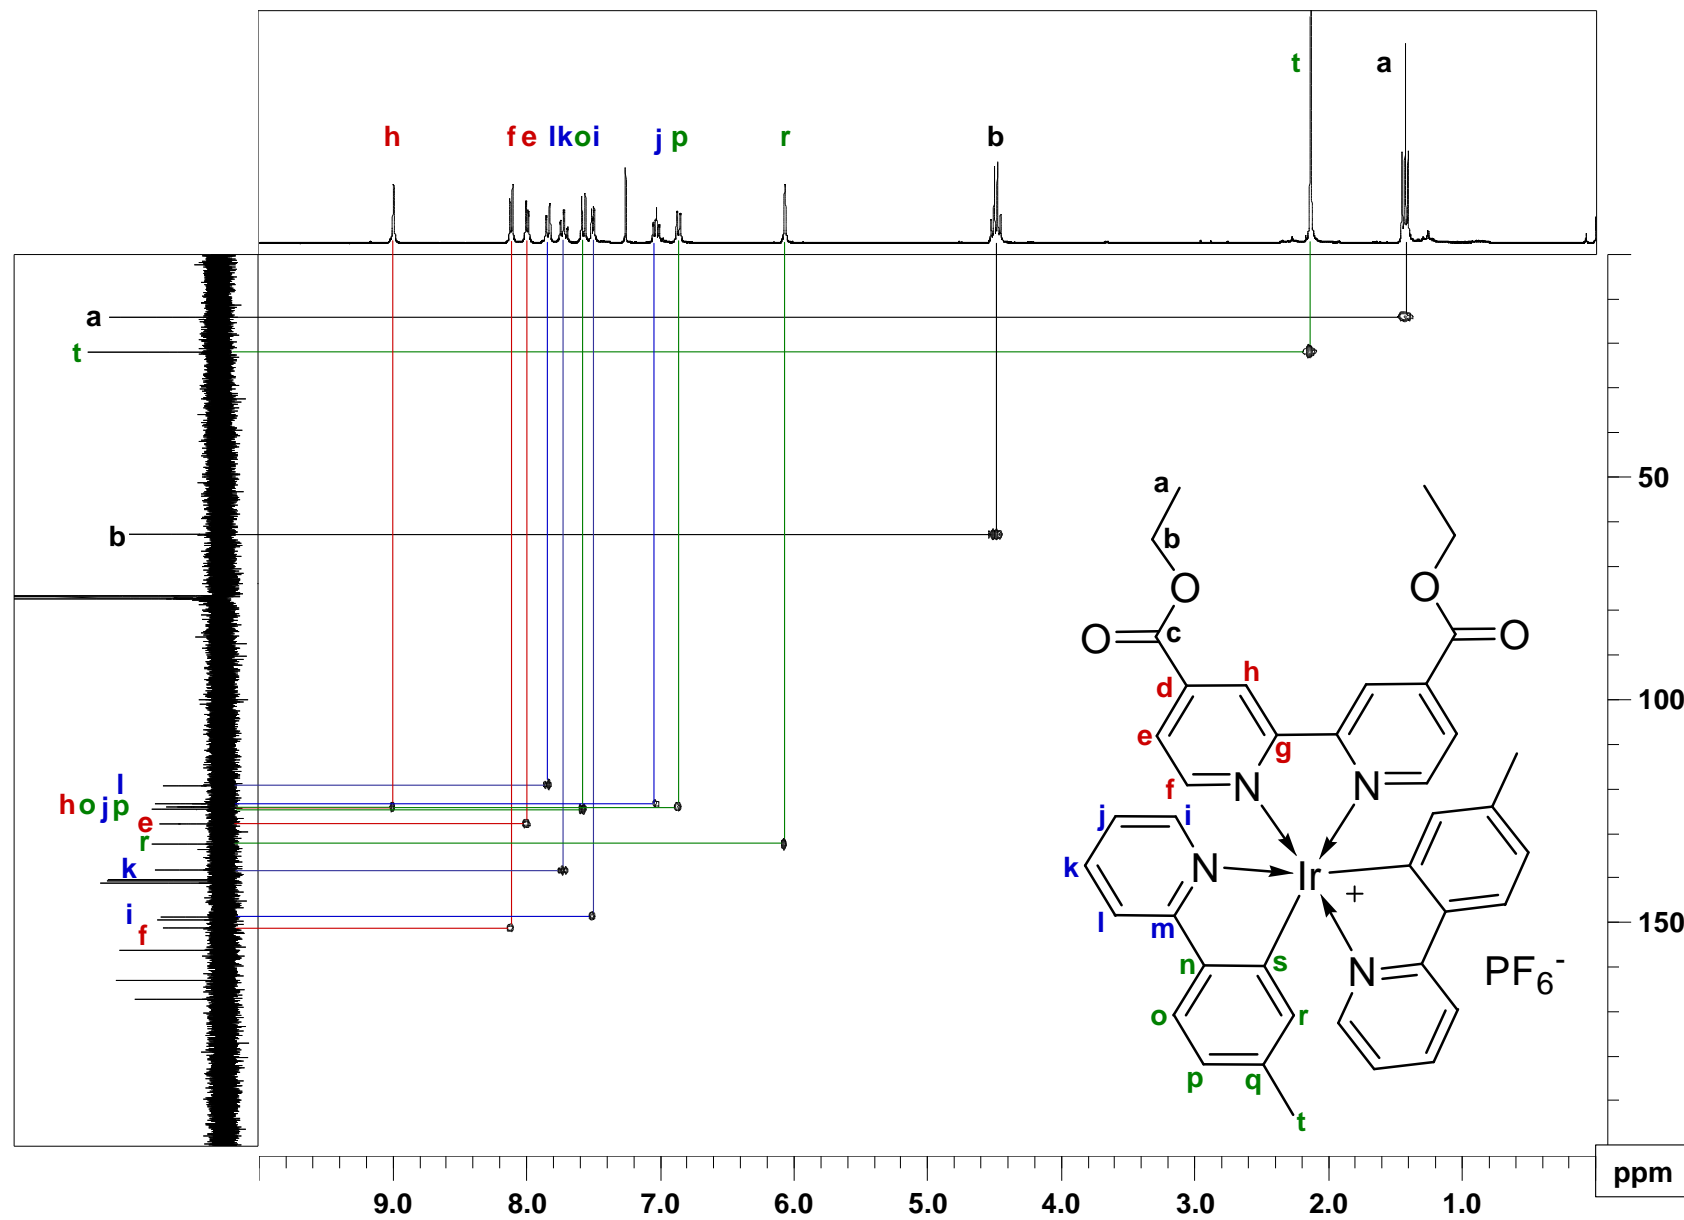

Figure S4. HSQC of complex 1.
